# Supplementary material for: An electrochemical biosensing platform based on 1-formylpyrene functionalized reduced graphene oxide for sensitive determination of phenol
Source: Royal Society of Chemistry journal article supplement (doi:10.1039/c5ra27563f), 2016-01-01
Supplement: c5ra27563f1.pdf [file c5ra27563f1.pdf]

### Supplementary information

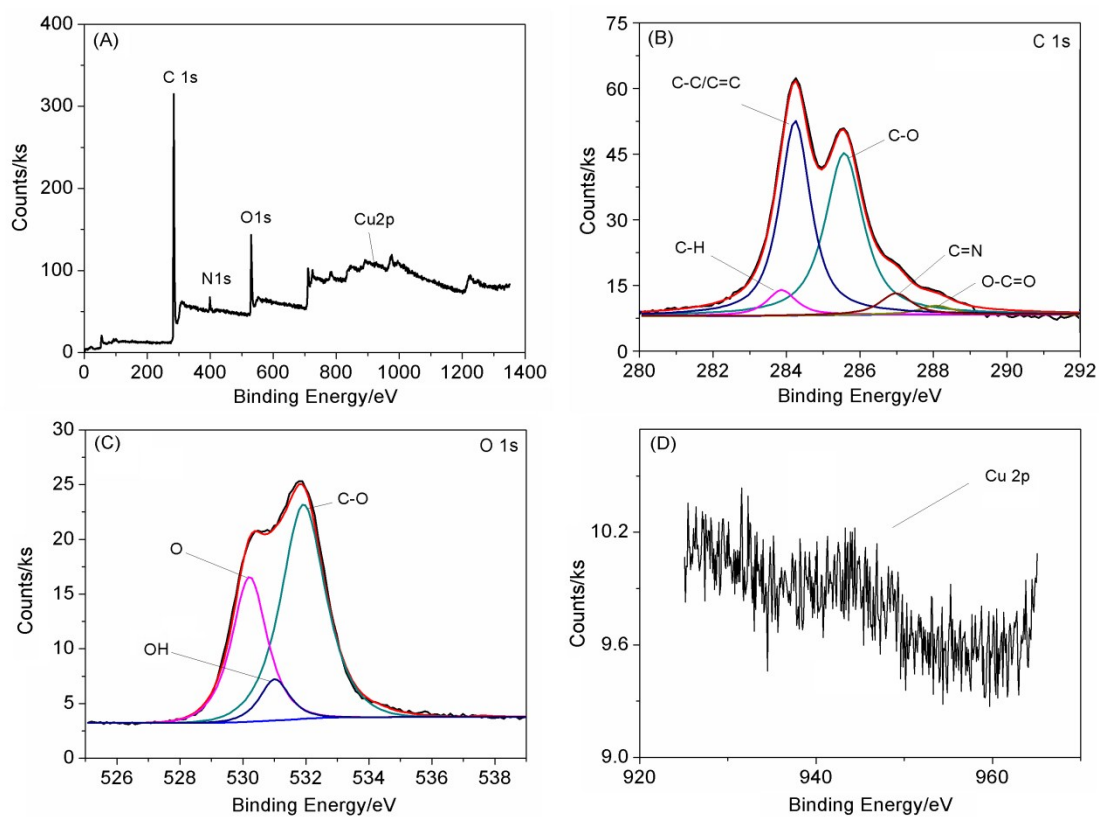

**Fig. S1.** XPS spectra of the Tyr-1-FP/rGO electrode: wide scan (A) and high resolution scans for C 1s (B), O 1s (C), Cu 2p (D).

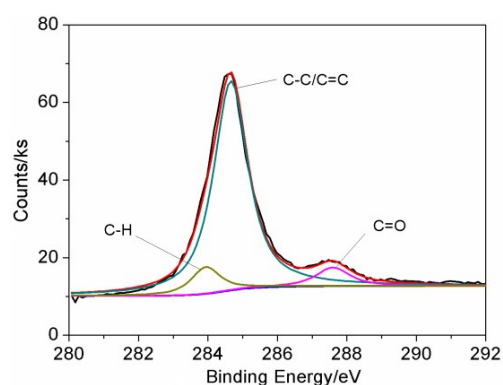

**Fig. S2.** XPS spectrum of the 1-FP/rGO: high resolution scans for C 1s.
